# Supplementary material for: Tracking antimalarial drug resistance using mosquito blood meals: a cross-sectional study
Source: PubMed Central journal article supplement — Lancet Microbe. Author manuscript; Available in PMC 2023 Jul 24. (PMC10365133; doi:10.1016/s2666-5247(23)00063-0), 2023-04-20
Supplement: NIHMS1905833-supplement-1.pdf [file NIHMS1905833-supplement-1.pdf]

# THE LANCET Microbe

## Supplementary appendix 1

This translation in French was submitted by the authors and we reproduce it as supplied. It has not been peer reviewed. *The Lancet's* editorial processes have only been applied to the original in English, which should serve as reference for this manuscript.

Cette traduction en français a été proposée par les auteurs et nous l'avons reproduite telle quelle. Elle n'a pas été examinée par des pairs. Les processus éditoriaux du *Lancet* n'ont été appliqués qu'à l'original en anglais et c'est cette version qui doit servir de référence pour ce manuscrit.

Supplement to: Ehrlich HY, Somé AF, Bazié T, et al. Tracking antimalarial drug resistance using mosquito blood meals: a cross-sectional study. *Lancet Microbe* 2023; published online April 19. [https://doi.org/10.1016/S2666-5247\(23\)00063-0](https://doi.org/10.1016/S2666-5247(23)00063-0).

## Résumé

**Introduction** Des systèmes de surveillance robustes avec une large couverture géographique sont nécessaires pour détecter et répondre aux cas de résistance aux médicaments antipaludiques sur le continent africain. Nous avons évalué l'utilité et la faisabilité de l'utilisation de moustiques gorgés de sang (xénomonitoring) pour une surveillance rapide des marqueurs moléculaires associés à la résistance dans les populations humaines.

**Méthodes** Nous avons mené trois enquêtes transversales au cours de deux saisons pluvieuses et d'une saison sèche intermédiaire au sud-ouest du Burkina Faso entre le 10 octobre 2018 et le 17 septembre 2019. Nous avons collecté des échantillons de sang humain et des moustiques gorgés de sang résidents dans des groupes de ménages sélectionnés à travers sept quartiers du village. Les échantillons ont d'abord été analysés pour la détection de *Plasmodium falciparum* par la technique de la réaction en chaîne par polymérase quantitative et ultrasensible (quantitative PCR), ensuite génotypés pour deux marqueurs de sensibilité réduite aux médicaments, *pfmdr1* 256A>T (Asn86Tyr) et *pfcr1* 227A>C (Lys76Thr), et enfin séquencés pour quatre marqueurs de clonalité. Nous avons évalué l'équivalence statistique en émettant une marge d'équivalence de 10%.

**Résultats** Nous avons identifié 551 infections à *Plasmodium sp* sur 1483 échantillons de sang humain (multiplicité moyenne d'infection [MOI] 1,94 ; SD : 1,47) et 346 infections sur 2151 repas sanguins des moustiques collectés (MOI 2,2 ; SD : 1,67). Les fréquences de *pfmdr1* Asn86Tyr étaient respectivement de 4 %, 2 % et 12 % dans la première, deuxième et troisième enquête dans les échantillons humains; puis respectivement 3 %, 0 % et 8 % dans la première, deuxième et troisième enquête dans les repas sanguins des moustiques. Les fréquences inter-hôtes étaient statistiquement équivalentes dans la première et deuxième enquête ( $p < 0,0001$ ) mais pas dans la troisième enquête ( $p = 0,062$ ) avec une tolérabilité de 0,1. Les fréquences de *pfcr1* Lys76Thr étaient respectivement de 16%, 55% et 11% dans la première, deuxième et troisième enquête chez les humains et de 40%, 72% et 13% dans la première, deuxième et troisième enquête chez les moustiques. Les fréquences inter-hôtes étaient équivalentes uniquement dans la troisième enquête ( $p = 0,032$ ) avec une tolérabilité de 0,1. Dans les simulations, les multiples sources de repas non préférentiel des moustiques, réduisaient la précision des estimations de fréquence entre les hôtes, en particulier pour les marqueurs circulant à des fréquences plus élevées.

**Interprétation** Les marqueurs moléculaires de résistance présents dans les repas sanguins de moustiques et chez les humains ont montré des tendances temporelles similaires, mais les fréquences n'étaient pas statistiquement équivalentes dans tous les scénarios. Des travaux supplémentaires seront nécessaires pour déterminer les seuils de différence empiriques et pragmatiques. La xénomonitoring pourrait être un outil efficace pour fournir des informations rapides sur l'émergence de la résistance aux antipaludiques dans les régions où la surveillance est insuffisante.

**Source de financement** National Institute of Allergy and Infectious Diseases (Institut national des allergies et des maladies infectieuses)
